# Supplementary material
Source: publisher site journal article supplement (https://www.dovepress.com/article/131580)

**\*6 1707delT \*45 1716G>A**

Cyp2D6 1756 CACCTTGC GCAACTTGGGCCTGGGCAAGAAGTCGCTGGAGCAGTGGGTGACCAGGAGGCC  
Cyp2D7 1753 .....  
Cyp2D8 2672 .....C.....G.....  
consensus 2701 \*\*\*\*\*.\*\*\*\*\*.\*\*\*\*\*.\*\*\*\*\*

**\*6 Rev - \*4 Fwd \*8 1758 G>T**

Cyp2D6 1816 CGCCTGCCTTTGTGC**CGCCTTCGCCAACCACTCCGG**TGGGTGATGGGCAGAAGGGCACAA  
Cyp2D7 1813 .....G...AG.....C  
Cyp2D8 2732 .....C.....G...AG..A.....G.....  
consensus 2761 \*\*\*\*\*.\*\*\*\*\*.\*\*\*.\*\*\*.\*\*\*\*\*.\*\*\*\*\*.

Cyp2D6 1876 AGCGGAACTGGGAAGGCGGGGACGGGAAGGCGACCCCTTACCCGCATCTCCC**ACCCC**  
Cyp2D7 1873 .....A.....M.....  
Cyp2D8 2792 .....T..A...T.....G.....G.....  
consensus 2821 \*\*\*\*\*.\*\*\*.\*\*\*.\*\*\*.\*\*\*\*\*.\*\*\*\*\*.\*\*\*\*\*.\*\*\*\*\*

**\*4 1846G>A \*40 1863\_1864ins(TTTCGCCCC)<sub>2</sub> \*4 Rev**

Cyp2D6 1936 **CARGACGCCCTTTTCGCCCCAACGGTCTCTTGGACAAAGCCGTGAGCAACGTGATCGCCT**  
Cyp2D7 1933 .....SS.....  
Cyp2D8 2852 .....A.....C...C..A.....G.C.....  
consensus 2881 \*\*\*\*\*.\*\*\*\*\*.\*\*\*\*\*.\*\*\*.\*\*\*.\*\*\*\*\*.\*\*\*.\*\*\*\*\*.\*\*\*\*\*

**Exon 4**

Cyp2D6 1996 **CCCTCACCTGCGGGCGCCGCTTTCGAGTACGACGACCCCTCGCTTCCTCAGGCTGCTGGACC**  
Cyp2D7 1993 .....  
Cyp2D8 2912 .....Y.....A.....  
consensus 2941 \*\*\*\*\*.\*\*\*\*\*.\*\*\*\*\*.\*\*\*\*\*.\*\*\*\*\*.\*\*\*\*\*.\*\*\*\*\*

**\*20 1973\_1974InsG**

Cyp2D6 2056 **TAGCTCAGGAGGGACTGAAGGAGGAGTCGGGCTTTCTGCGCGAGGTGCGGAGCGAGAGA**  
Cyp2D7 2053 .....G.....YY.....C.....A..G.-  
Cyp2D8 2972 .....A-.....T.....RCT.....Y.A..A..T.....G..  
consensus 3001 \*\*\*\*\*.\*\*\*\*\*.\*\*\*\*\*.\*\*\*\*\*.\*\*\*.\*\*\*.\*\*\*.\*\*\*.\*\*\*.\*\*\*.\*\*\*.\*\*\*

Cyp2D6 2115 CCGAGGAGTCTCTGCAGGGCGAGCTCCCGAGAGGTGCCGGGGCTGGACTGGGGCCTCGGA  
Cyp2D7 2112 -----...T.....T.....C..  
Cyp2D8 3031 ...CA.G.....T.....A...C.GCC..A...CA.  
consensus 3061 .....\*\*\*.\*\*\*\*\*.\*\*\*\*\*.\*\*\*\*\*.\*\*\*.\*\*\*.\*\*\*.\*\*\*.\*\*\*.\*\*\*.\*\*\*

Cyp2D6 2175 AGAGCAGGATTTGCATAGATGGGTTTGGGAAAGGACATTCCAGGAGACCCCACTGT---A  
Cyp2D7 2164 ..G.....R.....---  
Cyp2D8 3091 G.....G.....GT.....A...G.T....CTAG.  
consensus 3121 .\*.\*\*\*\*\*.\*\*\*\*\*.\*\*\*\*\*.\*\*\*\*\*.\*\*\*\*\*.\*\*\*\*\*.\*\*\*\*\*.\*\*\*\*\*

Cyp2D6 2232 AGAAGGGCCTGGAGGAGGAGGGGACATCTCAGACATGGTCGTGGGAGAGGTGTGCCCGGG  
Cyp2D7 2221 .....  
Cyp2D8 3151 G.....T.....A.....T.C.....  
consensus 3181 .\*\*\*\*\*.\*\*\*\*\*.\*\*\*\*\*.\*\*\*\*\*.\*\*\*\*\*.\*\*\*\*\*.\*\*\*\*\*.\*\*\*\*\*

Cyp2D6 2292 TCAGGGGGCACCAGGAGAGGCCAAGGACTCTGTACCTCCTATCCACGTCAGAGATTTCGA  
Cyp2D7 2281 .....-..CG.....TGK.....  
Cyp2D8 3211 .....A..A.....C...G.....G.....A.TG.....T..  
consensus 3241 \*\*\*\*\*.\*\*\*.\*\*\*\*\*.\*\*\*\*\*.\*\*\*.\*\*\*.\*\*\*\*\*.\*\*\*.\*\*\*\*\*.\*\*\*

Cyp2D6 2352 TTTT-AGGTTTCTCCTCTGG-----GCAAGGAGAGAG--GGTGGAGGCTGGCACTT  
Cyp2D7 2340 ....-...Y.....-----AG.....  
Cyp2D8 3271 ....T.....CAGCCAGG.....--.....  
consensus 3301 \*\*\*\*.\*\*\*\*.\*\*\*\*\*.\*\*\*\*\*.\*\*\*\*\*.\*\*\*\*\*.\*\*\*\*\*.\*\*\*\*\*



**\*41 Rev**

Cyp2D6 3108 **TTGCTGGGACACC**CGGGGCTCCAAGCACAGGCTTGACCAGGATCCTGTAAGCCTGACCTC  
Cyp2D7 3100 .A.....T.C.....G..G.....C.....A..T..  
Cyp2D8 4042 .A.....R..A.....G.....T.....A.....  
consensus 4081 \*.\*\*\*\*\*.\*\*\*.\*\*\*.\*\*\*\*\*.\*\*\*.\*\*\*\*\*.\*\*\*\*\*.\*\*\*.\*\*\*

Cyp2D6 3168 CTCCAACATAGGAGGCAAGAAGGAGTGTGAGGGCCGACCCCCTGGGTGCTGACCCATTG  
Cyp2D7 3160 .....C...S.A.G.--.....-----  
Cyp2D8 4102 .....C.....G.--.....T..-T.....  
consensus 4141 \*\*\*\*\*.\*\*\*\*\*.\*\*\*.\*\*\*.\*\*\*\*\*.\*\*\*\*\*.\*\*\*\*\*.\*\*\*\*\*.\*\*\*\*\*

**Exon 7** \*29 3183G>A  
**\*36 Cyp2D6->2D7 hybrid point**

Cyp2D6 3228 TGGGGACGCATGCTGTCCAG**CCGTGTCCAACAGGAGATCGACGAC**GTGATAGGGCAGG  
Cyp2D7 3207 .....T.....  
Cyp2D8 4159 .....G.....---.....A.....  
consensus 4201 \*\*\*\*\*.\*\*\*\*\*.\*\*\*\*\*.\*\*\*\*\*.\*\*\*\*\*.\*\*\*\*\*.\*\*\*\*\*.\*\*\*\*\*

**\*56 3201C>T**

Cyp2D6 3288 **TGCGG**GACCAGAGATGGGTGACCAGGCTCACATGCCCTACACCACTGCCGTGATTTCATG  
Cyp2D7 3267 .....R.....Y..  
Cyp2D8 4216 ..T..T.....G.....G.....C..  
consensus 4261 \*\*.\*\*\*.\*\*\*\*\*.\*\*\*\*\*.\*\*\*\*\*.\*\*\*\*\*.\*\*\*\*\*.\*\*\*\*\*.\*\*\*

**\*42 3259\_3260insGT**

Cyp2D6 3348 **AGCT**GCAGCGCTTTGGGGACATCGTCCCCCTGGGTGTGACCCATATGACATCCCGTGACA  
Cyp2D7 3327 .....R.....R.....R.....  
Cyp2D8 4276 .....  
consensus 4321 \*\*\*\*\*.\*\*\*\*\*.\*\*\*\*\*.\*\*\*\*\*.\*\*\*\*\*.\*\*\*\*\*.\*\*\*\*\*.\*\*\*\*\*

Cyp2D6 3408 **TCGAAGTACAGGGCTTCCGCATCCCTAAG**TAGGCCTGGCGCCCTCCTCACCCAGCTCA  
Cyp2D7 3387 .....  
Cyp2D8 4336 .....A.....  
consensus 4381 \*\*\*\*\*.\*\*\*\*\*.\*\*\*\*\*.\*\*\*\*\*.\*\*\*\*\*.\*\*\*\*\*.\*\*\*\*\*.\*\*\*\*\*

Cyp2D6 3468 GCACCAGCMCCTGGTGATAGCCCCAGCATGGCTACTGCCAGGTGGGCCCACTCTAGGAAC  
Cyp2D7 3447 ...Y...C.....R.....  
Cyp2D8 4396 .....C.....Y.....C.....G.....  
consensus 4441 \*\*\*.\*\*\*\*.\*\*\*\*\*.\*\*\*\*.\*\*\*\*\*.\*\*\*\*\*.\*\*\*\*\*.\*\*\*\*\*.\*\*\*\*\*

Cyp2D6 3528 CCTGGCCACCTAGTCCTCAATGCCACCACACTGACTGTCCCCACTTGGGTGGGGGGTCCA  
Cyp2D7 3507 .....R.....R.....  
Cyp2D8 4456 .....C.....TC.....AG.C.....T.....G..  
consensus 4501 \*\*\*\*\*.\*\*\*\*\*.\*\*\*\*\*.\*\*\*\*\*.\*\*\*\*\*.\*\*\*\*\*.\*\*\*\*\*.\*\*\*\*\*

Cyp2D6 3588 GAGTATAGGCAGGGCTGGCCTGTCCATCCAGAGCCCCGTCTAGTGGGA-GACAAACCA  
Cyp2D7 3567 .....A.....Y..  
Cyp2D8 4516 .....A.....A.G..G....  
consensus 4561 \*\*\*\*\*.\*\*\*\*\*.\*\*\*\*\*.\*\*\*\*\*.\*\*\*\*\*.\*\*\*\*\*.\*\*\*.\*\*\*.\*\*\*

Cyp2D6 3647 GGACCTGCCAGAATGTTGGAGGACCC-AACRCCTGCAGGGAGAGGGGGCAGTGTGGGTGC  
Cyp2D7 3627 .....-G.G.....  
Cyp2D8 4576 .....C..TA...T.....T..C...C..  
consensus 4621 \*\*\*\*\*.\*\*\*.\*\*\*\*\*.\*\*\*\*\*.\*\*\*\*\*.\*\*\*\*\*.\*\*\*.\*\*\*\*\*.\*\*\*

Cyp2D6 3706 CTCTGAGAGGTGTGACTGCGCCCTGCTGTGGGTGCGGAGAGGTACTGTGGAGCTTCTCG  
Cyp2D7 3686 .....  
Cyp2D8 4636 TC.CAG.....CR.....G..C.....  
consensus 4681 ..\*...\*\*\*\*\*.\*\*\*\*\*.\*\*\*\*\*.\*\*\*\*\*.\*\*\*\*\*.\*\*\*\*\*

Cyp2D6 3766 GGCGCAGGACTAGTTGACAGAGTCCAGCTGTGTGCCAGGCAGTGTGTGTCCCCGTGTGT  
 Cyp2D7 3746 .....  
 Cyp2D8 4696 ...A.....T.....C  
 consensus 4741 \*\*\*.\*\*\*\*\*.

Cyp2D6 3826 TTGGTGGCAGGGGTCCCAGCATCCTAGAGTCCAGTCCCCTCTCACCTGCATCTYCTG  
 Cyp2D7 3806 .....C...  
 Cyp2D8 4756 .....  
 consensus 4801 \*\*\*\*.\*\*\*\*\*.

**Exon 8**

Cyp2D6 3886 CCCAGGGAACGACACTCATCACCACCTGTCATCGGTGCTGAAGGATGAGGCCGTCTGGG  
 Cyp2D7 3866 .....R  
 Cyp2D8 4810 .....G.T..TG...T.....  
 consensus 4861 \*\*\*\*\*.\*.\*.\*.\*\*\*.\*\*\*\*\*.

Cyp2D6 3946 AGAAGCCCTTCCGCTTCCACCCCGAACACTTCTGGATGCCAGGGCCACTTTGTGAAGC  
 Cyp2D7 3926 .....  
 Cyp2D8 4870 .....Y.....  
 consensus 4921 \*\*\*\*\*.\*\*\*\*\*.

Cyp2D6 4006 CGGAGGCCTTCCCTGCCTTTCTCAGCAGGTGCCTGKGGGAGCCCGGCTCCCTGTCCCCTT  
 Cyp2D7 3986 .....T.....  
 Cyp2D8 4930 Y.....T.....  
 consensus 4981 .\*\*\*\*\*.\*\*\*\*\*.

Cyp2D6 4066 CCGTGGAGTCTTGACAGGGTATCACCCAGGAGCCAGGCTCACTGACGCCCTCCCCTCCC  
 Cyp2D7 4046 .....  
 Cyp2D8 4990 .....G.....  
 consensus 5041 \*\*\*\*\*.\*\*\*\*\*.

**Exon 9**

Cyp2D6 4126 CACAGGCCCGTGCATGCCTCGGGG-AGCCCTGGCCCGCATGGAGCTCTTCTCTTCT  
 Cyp2D7 4106 .....-.....  
 Cyp2D8 5050 .....SC.....R.....  
 consensus 5101 \*\*\*\*\*.\*\*\*\*\*.\*\*\*\*\*.

\*18 4125\_4133dupGTGCCACT

\*36 conv. fra 2D6 til 2D7->

Cyp2D6 4185 TCACCTCCCTGCTGCAGCACTTCCAGCTTCTC GTGCCACTGGACAGCCCCGGC CCAGCC  
 Cyp2D7 4165 .....C...G..G.C.....  
 Cyp2D8 5110 .....CR.....  
 consensus 5161 \*\*\*\*\*.\*\*\*.\*.\*.\*\*\*\*\*.

Cyp2D6 4245 ACCATGGTGTCTTTGCTTTCCTGGTGASCCCATCCCCCTATGAGCTTTGTGCTGTGCCCC  
 Cyp2D7 4225 ..TC.C....G.CAGC..T.....C.....Y.....  
 Cyp2D8 5170 ..TC.C....G.C.GC..T.....CG.....  
 consensus 5221 \*\*.\*.\*\*\*\*\*.\*.....\*\*.\*\*\*\*\*\*.\*\*\*\*\*.\*\*\*\*\*.

Cyp2D6 4305 GCTAGAATGGGGTACCTAGTCCCCAGCCTGCTCCCTAGCCAGAGGCTCTAATGTACAATA  
 Cyp2D7 4285 .....  
 Cyp2D8 5230 .....G-----TC..TG-.A.C..GT.....  
 consensus 5281 \*\*\*\*\*.\*.....\*\*\*\*\*.\*\*\*.\*.\*.\*.\*.\*\*\*\*\*.

Cyp2D6 4365 AAGCAATGTGGTAGTTCCAA  
 Cyp2D7 4345 .....  
 Cyp2D8 5269 ..TT.G.C.A..G.C...--  
 consensus 5341 \*\*.\*.\*.\*.\*.\*.\*\*\*.

## Alignment of *CYP2C19* and *CYP2C9*

Nomenclature:

Forward Primer

Reverse primer

Overlapping primers (Forward/Reverse)

Probe region

SNP/deletion targeted i assays

### >*CYP2C19*\*2 NG\_008384 23581-24841 – rs2444285 19154G>A

```

Cyp2C19      1  ATAATTGTATGATTTTACAGAAGTCATTTAACTGCTCTGGTGCACAGTTGGAATTTGAAG
Cyp2c9       1  .....G.....T.....
consensus    1  *****.*****.*****.*****.*****.*****.*****.*****

Cyp2C19     61  TATCTTTGAGCCCCCTCCCACTTCTAAAATACTAATTCAATTTTCAGAGGCTGCTTGATAGA
Cyp2c9      61  .....C.....
consensus   61  *****.*****.*****.*****.*****.*****.*****.*****

Cyp2C19    121  AATCAATATAGCAGGGACTATCTTTGTAGTATCAATCAGGTTGTGCAAACCTCTTTTAACC
Cyp2c9     121  .....T.....G.....C.....C....T.....
consensus  121  *****.*****.*****.*****.*****.*****.*****.*****

Cyp2C19    181  TATGCTATCATCTCCAAAATGTTAATGTAGTAATTCATACCATCTTATATTTCAAGATTG
Cyp2c9     181  .....G.....A.....C..G.....G.....A
consensus  181  *****.*****.*****.*.*****.*****.*****.*****.*****

Cyp2C19    241  TAGAGAAGAATTGTTGTAAAAGTAAGAGAATTAATATAAAGATGCTTTTATACTATCAA
Cyp2c9     241  .....---.....C.....C.....A..
consensus  241  *****.*****.*****.*****.*****.*****.*****.*****

Cyp2C19    301  AAGCAGGTATAAGTCTAGGAAATGATTATCATCT-----TTGATTCTCTTGTCAGAA
Cyp2c9     298  ...G...C.G.....GGTTAGAA....C...G.....
consensus  301  **.***.*.*****.*****.*****.*****.*****.*****

Cyp2C19    353  TTTTCTTTCTCAAATCTTGTATAATCAGAGAATTACTACACATGTACAATAAAAATTTCC
Cyp2c9     358  .....T.....T.....
consensus  361  *****.*****.*****.*****.*****.*****.*****.*****

Cyp2C19    413  CCATCAAGATATACAATATATTTTATTTATATTTATAGTTTTAAATTACAACCAGAGCTT
Cyp2c9     418  .....C.G...T.....
consensus  421  *****.*****.*****.*****.*****.*****.*****.*****

Cyp2C19    473  GGCATATTGTATCTATACCTTTTATTAATGCTTTTAAATTAATAAATTATTGTTT-TCTC
Cyp2c9     478  ..T...G...G...G.T.....AT.....-....
consensus  481  **.***.***.***.*.*****.*****.*****.*****.*****.*****

                                     Cyp2C19*2 - 19154G>A
Cyp2C19    532  TTAGATATGCAATAATTTTCCCACTATCATTGATTATTTCCCGGGAACCCATAACAAATT
Cyp2c9     537  .....C.....T.TC.....C.....T..C.....
consensus  541  *****.*****.*.*****.*****.*****.*****.*****.*****

Cyp2C19    592  ACTTAAAAACCTTGCTTTTATGGAAAGTGATATTTGGAGAAAGTAAAAGAACACCAAGA
Cyp2c9     597  .....G.....A....T.....A.....
consensus  601  *****.*****.*****.*****.*****.*****.*****.*****

Cyp2C19    652  ATCGATGGACATCAACAACCCTCGGGACTTTTATTGATTGCTTCCTGATCAAATGGAGAA
Cyp2c9     657  ...A.....G.....A.....G.....
consensus  661  **.***.***.***.*.*****.*****.*****.*****.*****.*****

```



Cyp2C19 712 GGTA AAAATGTTAACAAAAGCTTAGTTATGTGACTGCTTGC GTATTTGTGATT CATTGACT  
Cyp2c9 717 .....A.....T.A.....TG.....  
consensus 721 \*\*\*\*\*.\*\*\*\*\*.\*\*\*\*\*.\*\*\*\*\*.\*\*\*\*\*.\*\*\*\*\*.\*\*\*\*\*

Cyp2C19 772 AGTTTTGTGTTTACTACGGATGTTTAAACAGGTCAAGGAGTAATGCTTGAGAAGCATATTT  
Cyp2c9 777 ....C.....A.....T.....TC.....C-....  
consensus 781 \*\*\*\*.\*\*\*\*\*.\*\*\*\*\*.\*\*\*\*\*.\*\*\*\*\*.\*\*\*\*\*.\*\*\*\*\*.\*\*\*

Cyp2C19 832 AAGTTTTTTATTGTATGCATGAATATCCAGTAAGCATCATAGAAAATGTAAAATTAATTG  
Cyp2c9 836 .....A.....-----  
consensus 841 \*\*\*\*\*.\*\*\*\*\*.\*\*\*\*\*.\*\*\*\*\*.\*\*\*\*\*.\*\*\*\*\*.\*\*\*\*\*

Cyp2C19 892 TTAAATAATTAGAATACATAGAAGAAATTGTTTAGATAAAATATAATCTATCTGAACAATA  
Cyp2c9 -----  
consensus 901 .....  
Cyp2C19 952 AGGATGTCAGGATAGGAAAAGCTCTGTTCTGCAGCTTCCAGTGAGATCAGCACAGGAGGA  
Cyp2c9 -----  
consensus 961 .....  
Cyp2C19 1012 ACTTAAATTTAAAAGAAAATAAAAAACATCTCCATCAAAAAGTGAGTGAAGGATATGAAC  
Cyp2c9 -----  
consensus 1021 .....  
Cyp2C19 1072 AGACACTTTTCAAAGAAGTCATTGGAGAAATGCAAATAAAAAACAACAATGAGATACCAT  
Cyp2c9 -----  
consensus 1081 .....  
Cyp2C19 1132 CTCATGCCAGTTAGAATGGCGATCATTA AAAAGTCAGGATATAACAGATGCTGAAGAGGA  
Cyp2c9 -----  
consensus 1141 .....  
Cyp2C19 1192 TGTGGAAAATAGAAATGTTTTTACTCTGTTTGTGGGAGCGTAAATTAGTTCAATCATTG  
Cyp2c9 -----  
consensus 1201 .....  
Cyp2C19 1252 TGGAAGGCA  
Cyp2c9 -----  
consensus 1261 .....

**>CYP2C19\*3 region gj|460417326:22561-23561 – rs4986893 – 22948G>A**

Cyp2C19 1 AAATTTAGCATTTGAGCAACCATTATTTAACCAGCTAGGCTGTAATTGTTAATTCGAGAT  
Cyp2C9 1 .....A.....T.....G..C..C..AG...  
consensus 1 \*\*\*\*\*.\*\*\*\*\*.\*\*\*\*\*.\*\*\*\*\*.\*\*\*\*\*.\*\*\*\*\*.\*\*\*\*\*

Cyp2C19 61 TAATGTAAAAGTGATGTGTTGATTTTATGCATGCCAAACTCTTTTTTGCTTTTAAGGGAA  
Cyp2C9 61 .....A.....G.....G.....  
consensus 61 \*\*\*\*\*.\*\*\*\*\*.\*\*\*\*\*.\*\*\*\*\*.\*\*\*\*\*.\*\*\*\*\*.\*\*\*\*\*

Cyp2C19 121 TTCATAGGTAAGATATTACTTAAAATTTCTAAACTATTATTATCTGTTAACWAATATGAA  
Cyp2C9 121 ..TG.....-----.....C.....A....C--.  
consensus 121 \*\*..\*\*\*\*\*.\*\*\*\*\*.\*\*\*\*\*.\*\*\*\*\*.\*\*\*\*\*.\*\*\*\*\*.\*\*\*\*\*

Cyp2C19 181 GTGTTTTATATCTAATGTTTACTCATATTTTAAATTTGTTTCCAATCATTAGCTTCACC  
Cyp2C9 170 .....A....A.AG.....-.....T...T.....C.....  
consensus 181 \*\*\*\*\*.\*\*\*\*\*.\*\*\*\*\*.\*\*\*\*\*.\*\*\*\*\*.\*\*\*\*\*.\*\*\*\*\*.\*\*\*\*\*

Cyp2C19 241 CTGTGATCCCACTTTCATCCTGGGCTGTGCTCCCTGCAATGTGATCTGCTCCATTATTTT  
 Cyp2C9 229 .....  
 consensus 241 \*\*\*\*\*

Cyp2C19 301 CCAGAAACGTTTCGATTATAAAGATCAGCAATTTCTTAACTTGATGGAAAAATTGAATGA  
 Cyp2C9 289 ...T.....T.....A.....G.....  
 consensus 301 \*\*\*.\*\*\*\*\*.\*\*\*\*\*.\*\*\*\*\*.\*\*\*\*\*.\*\*\*\*\*.\*\*\*\*\*.\*\*\*\*\*

**Cyp2C19\*3 17948G>A**

Cyp2C19 361 AAASATCAGGATTGTAAGCACCCCTGATSCAGGTAAGGCCAAGTTTTTTGCTTCCTGA  
 Cyp2C9 349 ...C...A...T.G...G...G...C.....A.....  
 consensus 361 \*\*\*.\*\*\*.\*\*\*.\*.\*\*\*.\*\*\*.\*\*\*.\*\*\*.\*\*\*\*\*.\*\*\*\*\*.\*\*\*\*\*

Cyp2C19 421 GAAACCACCTTACAGTCTTTTTTTT-CTGGGAAATCC-AAAATTCTATATTGACCAAGCCCT  
 Cyp2C9 409 .....TTC.....T...AC.....C.....C..G..T.....T..  
 consensus 421 \*\*\*\*\*.\*\*\*.\*\*\*.\*\*\*.\*\*\*.\*\*\*.\*\*\*.\*\*\*.\*\*\*.\*\*\*.\*\*\*.\*\*\*.\*\*\*.\*\*\*

Cyp2C19 479 GAAGTACATTTTTGAATACTACAGTCTTGCCCTAGACAGCCATGGGGTGAATATCTGGAAA  
 Cyp2C9 469 ...K.G.....C.....T.....G..  
 consensus 481 \*\*\*.\*.\*\*\*\*\*.\*\*\*\*\*.\*\*\*\*\*.\*\*\*\*\*.\*\*\*\*\*.\*\*\*\*\*.\*\*\*

Cyp2C19 539 AGATGGCAAAGTTCCTTTATTTTATGCACAGGAAATGAATATCCCAATATAGATCAGGCTT  
 Cyp2C9 529 ...C...C...CC.....TG.....A...GC.T.....GC.T.AT..  
 consensus 541 \*\*\*.\*\*\*.\*\*\*.\*\*\*.\*\*\*.\*\*\*.\*\*\*.\*\*\*.\*\*\*.\*\*\*.\*\*\*.\*\*\*.\*\*\*.\*\*\*

Cyp2C19 599 CTAAGCCCATTAGCTCCCTGATCAGTGTTTTTTCCACTAAACTCCAAAGCCCTGTTTCTA  
 Cyp2C9 589 .....C....A.....TG.....G.....  
 consensus 601 \*\*\*\*\*.\*\*\*.\*\*\*.\*\*\*.\*\*\*.\*\*\*.\*\*\*.\*\*\*.\*\*\*.\*\*\*.\*\*\*.\*\*\*.\*\*\*.\*\*\*

Cyp2C19 659 TAAAGTACTTTGGTGACAGCCCCAAAGCGTGTATATCACTCCATGGACATCCAGGCAC  
 Cyp2C9 649 .....T.....T.....C...G.....T.....  
 consensus 661 \*\*\*\*\*.\*\*\*.\*\*\*.\*\*\*.\*\*\*.\*\*\*.\*\*\*.\*\*\*.\*\*\*.\*\*\*.\*\*\*.\*\*\*.\*\*\*.\*\*\*

Cyp2C19 719 TTTGGAGTCTTCCATTACTACAAGGCTTGTCCCTTCAATTCACACTTTGTCATATTGTGT  
 Cyp2C9 709 .....G..C.....A.....A.....G...A...  
 consensus 721 \*\*\*\*\*.\*\*\*.\*\*\*.\*\*\*.\*\*\*.\*\*\*.\*\*\*.\*\*\*.\*\*\*.\*\*\*.\*\*\*.\*\*\*.\*\*\*.\*\*\*

Cyp2C19 779 GACAGAAATATCCTAATCTAAAAGACATTATCTCCTTCAAGGACAGAGAATATTTGGAAC  
 Cyp2C9 769 .G.....T.....T..T.GG.....G..  
 consensus 781 \*.\*\*\*\*\*.\*\*\*\*\*.\*\*\*\*\*.\*\*\*.\*.\*\*\*\*\*.\*\*\*

Cyp2C19 839 CACAGAAGCTGCCAAGAAACACTGAATAGGGCAGAGGTGTTTGATGTCTCAGTTGGGATT  
 Cyp2C9 829 ..T.....G.....A.....C  
 consensus 841 \*\*.\*\*\*\*\*.\*\*\*\*\*.\*\*\*\*\*.\*\*\*\*\*.\*\*\*\*\*.\*\*\*

Cyp2C19 899 CTAGCTGATGAGACAGCTGG-TTAGGAATGAAAAAATTATTGTTTTTTTGGTGTATGAAC  
 Cyp2C9 889 .....T.....G.....C.....G...A.....  
 consensus 901 \*\*\*\*\*.\*\*\*.\*\*\*.\*\*\*.\*\*\*.\*\*\*.\*\*\*.\*\*\*.\*\*\*.\*\*\*.\*\*\*.\*\*\*.\*\*\*

Cyp2C19 958 CATAAACAGACATCACACTTTTACCCTGTGCTGAATTGGCATGT  
 Cyp2C9 949 .....A.....GC.....  
 consensus 961 \*\*\*\*\*.\*\*\*.\*\*\*.\*\*\*.\*\*\*.\*\*\*.\*\*\*.\*\*\*.\*\*\*

**>CYP2C19\*4 region gi|460417326:4561-5561 – rs28399504 – 5001A>G**

```

Cyp2C19      1  TTTTAAATATACAAGGCATAGAATATGGCCATTTCCGTTAAATCATAAATTCCCAACTGG
Cyp2C9       1  .....T.....T.....
consensus    1  *****.*****.*****
Cyp2C19     61  TTATTAATCTAAGAATTCAGAATTTTAAGTAATTGTTTTGCATCAGATTGTTTACTTCA
Cyp2C9       61  .....G.....C.....A.....
consensus    61  *****.*****.*****.*****
Cyp2C19     121  GTGCTCTCAATTATGACGGTGCATTGGAACCACTTGGGTTAACATTTTTTTGTTTTTATT
Cyp2C9       121  .....T.....A.....TC.....G...---.....
consensus    121  *****.*****.*****.*****.***...*****
Cyp2C19     181  ACCAATACCTAGGCTTCAACCTAGTACAATGAAACCAGAATGTACAGAGTGGGCACTGGG
Cyp2C9       178  .....C.....A.....G.....TG.....A..A..A
consensus    181  *****.*****.*****.*****.*****.***.***.
Cyp2C19     241  ACGAAGGAGAACAAGACCAAGGACATTTTATTTTTATCTCTATCAGTGGGTCAAAGTCC
Cyp2C9       238  .....G.....
consensus    241  *****.*****
Cyp2C19     301  TTTCAGAAGGAGCATATAGTGGGCCTAGGTGATTGGCCACTTTATCCATCAAAGAGGCAC
Cyp2C9       298  .....A.....T..A.....
consensus    301  *****.*****.***.*****
Cyp2C19     361  ACACACTTAATTAGCATGGAGTGTATAAAAAGCTTGGAGTGCAAGCTCACGGTTGTCTT
Cyp2C9       358  ...--CG.....G.....T.....
consensus    361  ***.***.*****.*****.*****
Cyp2C19*4 5001A>G
Cyp2C19     421  AACAAGAGGAGAAGGCTTCAATGGATCCTTTTGTGGTCCTTGTGCTCTGTCTCTCATGTT
Cyp2C9       416  .....A.....T..C.....
consensus    421  *****.*****.***.*****
Cyp2C19     481  TGCTTCTCCTTTCAATCTGGAGACAGAGCTCTGGGAGAGGAAAACCTCCCTCCTGGCCCYA
Cyp2C9       476  .....C.....C.
consensus    481  *****.*****.
Cyp2C19     541  CTCCTCTCCCAGTGATTGGAATATCCTACAGATAGATATTAAGGATGTCAAGCAAATCCT
Cyp2C9       536  .....G.....CA.....
consensus    541  *****.*****.*****
Cyp2C19     601  TAACCAATGTAAGTATGCTCCTTCAGTGGCTTGCAAAAGGTAAGTAAATTCACCTGTATT
Cyp2C9       596  .....
consensus    601  *****
Cyp2C19     661  TTTTAAATAAAGTATATCCCTAGAGGTACAATGTTACAAGAGATCATTGTAAAGTAAAT
Cyp2C9       656  .....G.....-.....G..A..G.....
consensus    661  *****.*****.*****.***.*****
Cyp2C19     721  ACTTTGAAAGGCTTTTGTTCCTTTTCCAGTCTGTTCAGTGTCAAGAAATAGTGAATGAAA
Cyp2C9       715  .....
consensus    721  *****
Cyp2C19     781  TAATATATTTTGTATTAGAGAAAGATTTAGGTCTTTGCATGTTAAATTCAGAATAACAA
Cyp2C9       775  CC..G.....G.G.....G.....G.....A.....
consensus    781  ..**.*.....*.....*****.*****.*****

```

```

Cyp2C19      841 ACTGTCAATAGTTTCAAATGTTGTGTTCCCTTCTTTATTTTCATAGCCATTTGCTAGAATTT
Cyp2C9       835 G-.....A.C.....C.....A.....T.....
consensus    841 ..*****.*.*****.*****.*****.*****

```

  

```

Cyp2C19      901 TTGGCTGAGGGTAAACAGTAAGGGAAGTGTGTTATTAGAGATTTTATTAAATAAGTCC
Cyp2C9       894 .....A.....TG.....-----
consensus    901 *****.******.******.....

```

  

```

Cyp2C19      961 TCTACTATATTAGCCATGTGTTTTATTTCAGAATAGCCGTGA
Cyp2C9       -----
consensus    961 .....

```

## CYP2D6 : Specificity of primers analysed by meltcurves

### Allele \*2

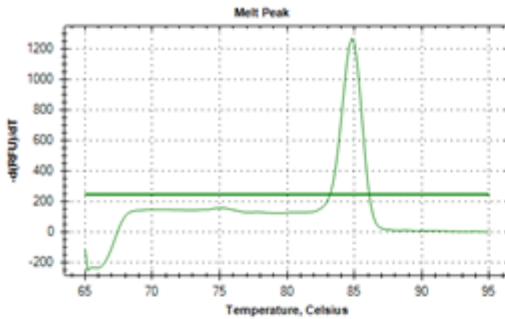

### Allele \*10

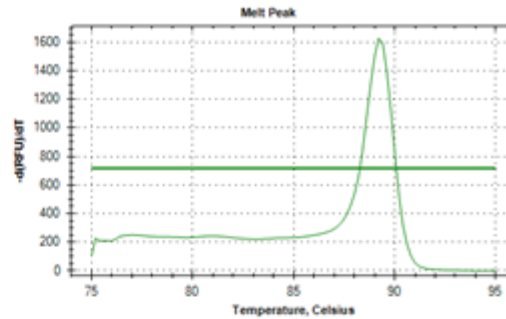

### Allele \*3/\*9

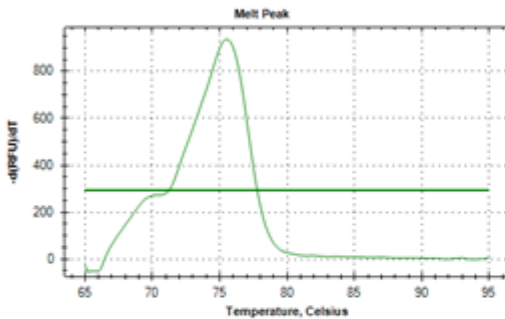

### Allele \*17

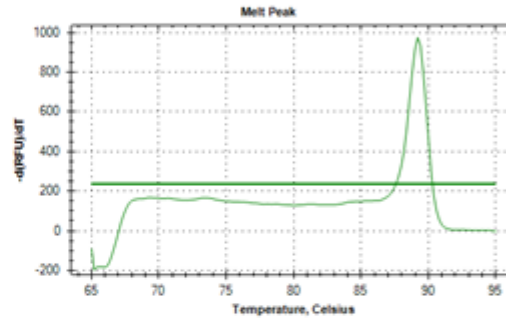

### Allele \*4

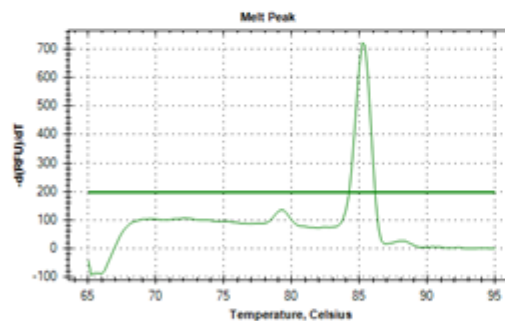

### Allele \*41

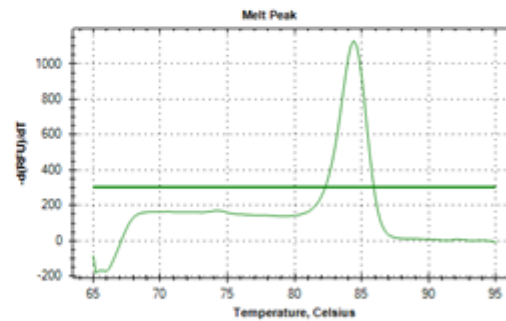

### Allele \*6

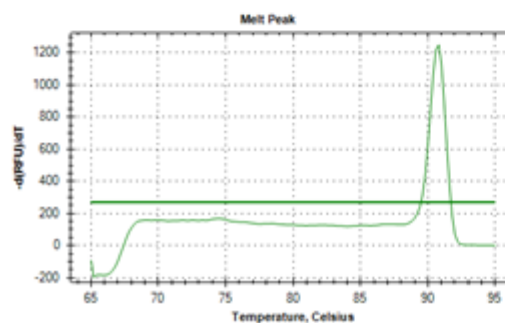

# CYP2C19 : Specificity of primers analysed by meltcurves

## Allele \*2

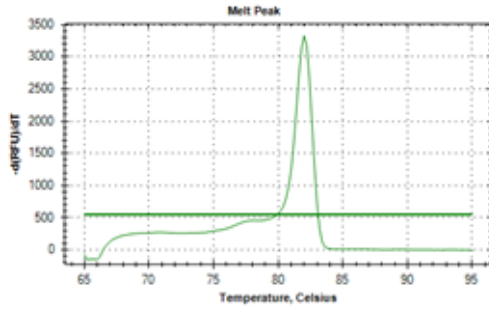

## Allele \*4

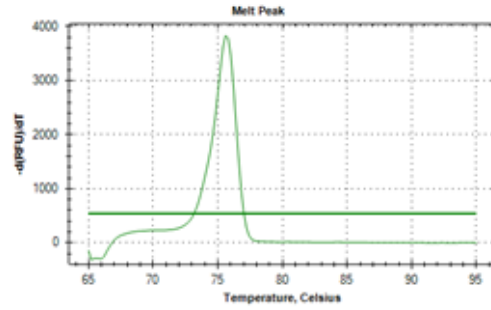

## Allele \*3

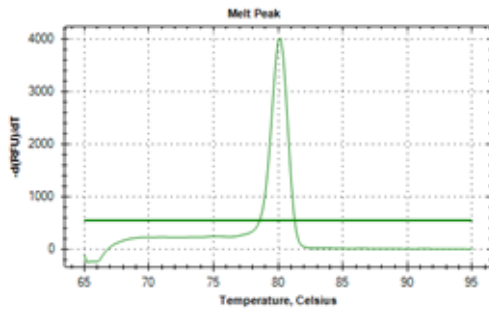

## **CYP2D6 : Allelic discrimination plots generated during validation**

Circled samples : Samples containing copy number variations (CNV) of SNP/Mutation

Samples in squares : Samples containing copy number variations of wildtype allele.

For most validations multiple NTC controls were included.

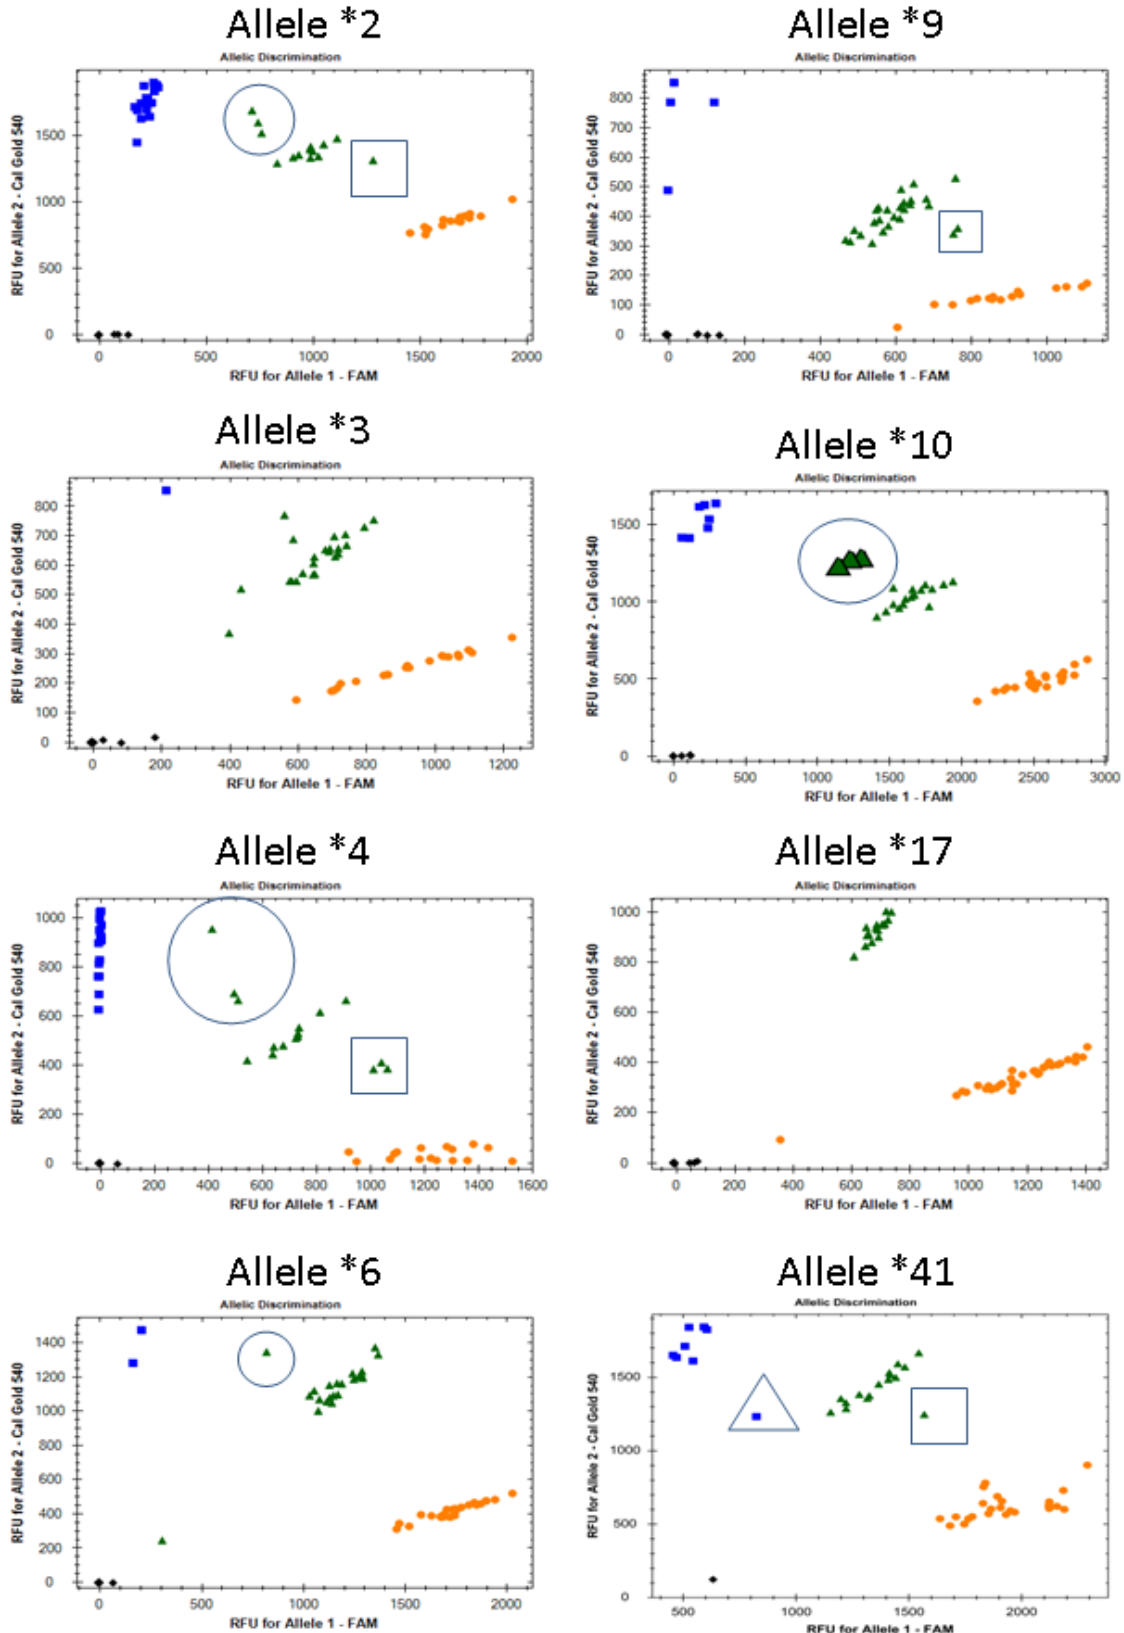

# CYP2C19 : Allelic discrimination plots generated during validation

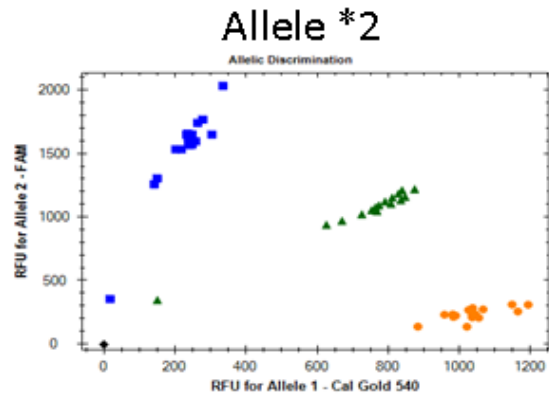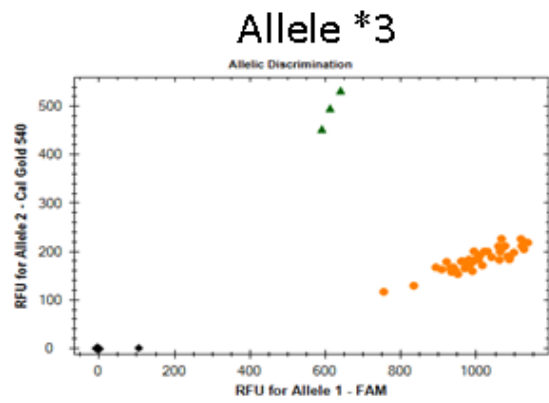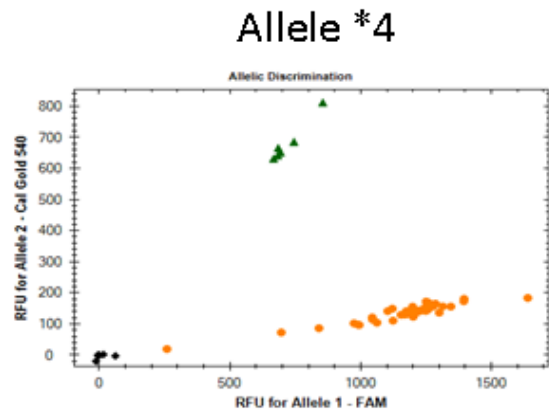

Supplement: Supplementary file 1 [file get_supplementary_file.php]
